# Supplementary material for: Core–shell assembly of carbon nanofibers and a 2D conductive metal–organic framework as a flexible free-standing membrane for high-performance supercapacitors
Source: Royal Society of Chemistry journal article supplement (doi:10.1039/c9qi00390h), 2019-01-01
Supplement: c9qi00390h1.pdf [file c9qi00390h1.pdf]

**Electronic Supplementary Information**

**Core-shell assembly of carbon nanofiber and 2D conductive metal-organic framework as flexible free-standing membrane for high-performance supercapacitor**

Shihang Zhao,<sup>a</sup> Huihui Wu,<sup>b</sup> Yanli Li,<sup>a</sup> Qin Li,<sup>a</sup> Jiaojiao Zhou,<sup>a</sup> Xianbo Yu,<sup>a</sup> Hongmei Chen,<sup>a</sup> Kai Tao,<sup>a</sup> and Lei Han<sup>a,c,\*</sup>

<sup>a</sup>School of Materials Science & Chemical Engineering, Ningbo University, Ningbo, Zhejiang 315211, China. E-mail: hanlei@nbu.edu.cn (L. Han).

<sup>b</sup>Pan Tianshou Arts and Design Academy, Ningbo University, Ningbo, Zhejiang 315211, China

<sup>c</sup>Key Laboratory of Photoelectric Materials and Devices of Zhejiang Province, Ningbo University, Ningbo, Zhejiang 315211, China

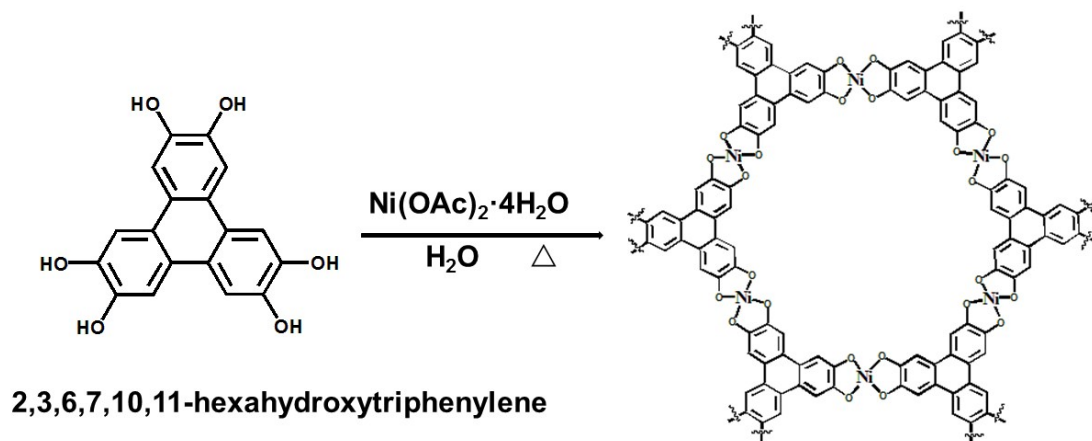

**Scheme S1** General reaction scheme for the synthesis of Ni-CAT.

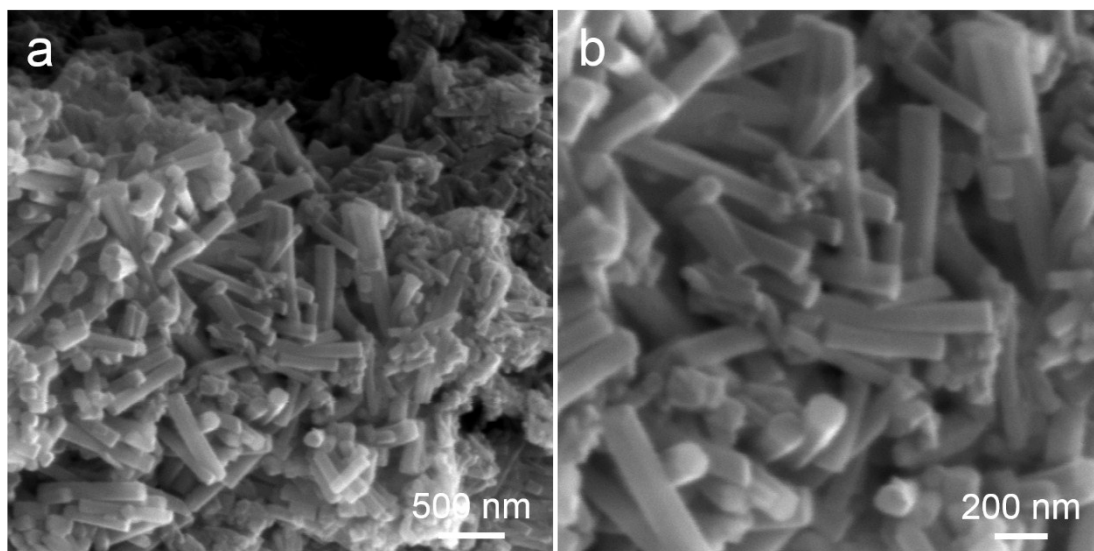

**Fig. S1** SEM images of pure Ni-CAT.

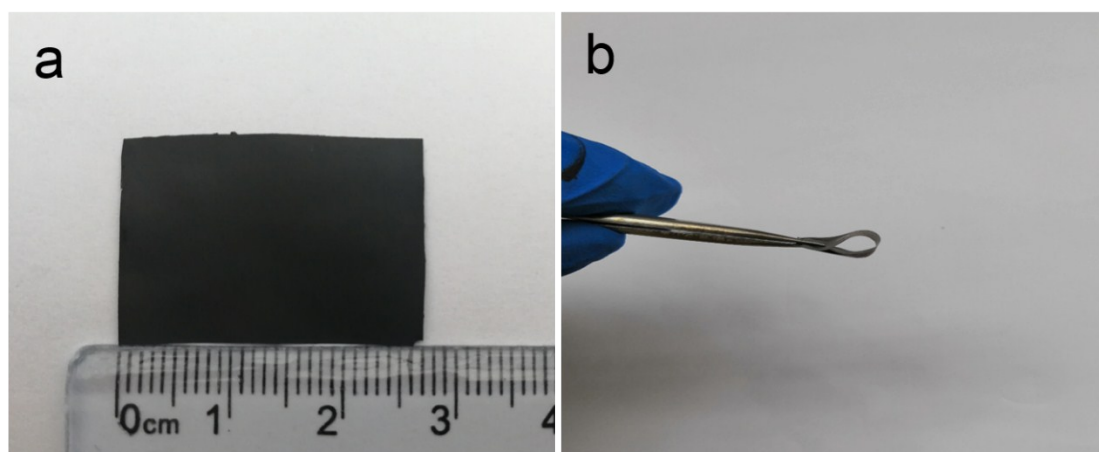

**Fig. S2** Representative photographs showing the highly flexible CNF@Ni-CAT membranes.

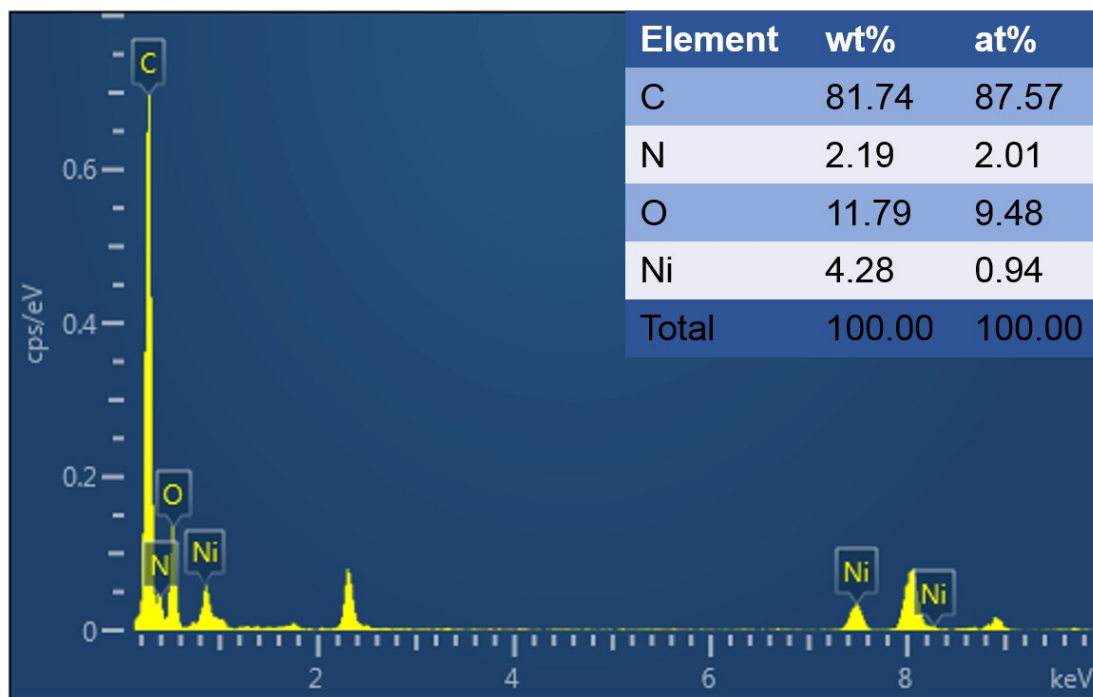

Fig. S3 EDX image of CNF@Ni-CAT.

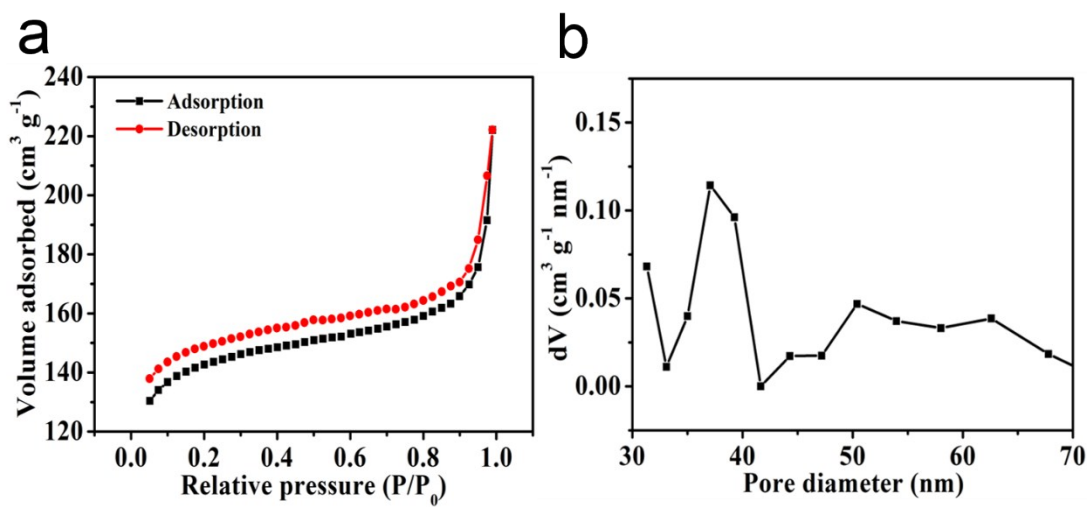

Fig. S4 (a) N<sub>2</sub> adsorption-desorption isotherms and (b) BJH pore size distribution curve of

CNF@Ni-CAT.

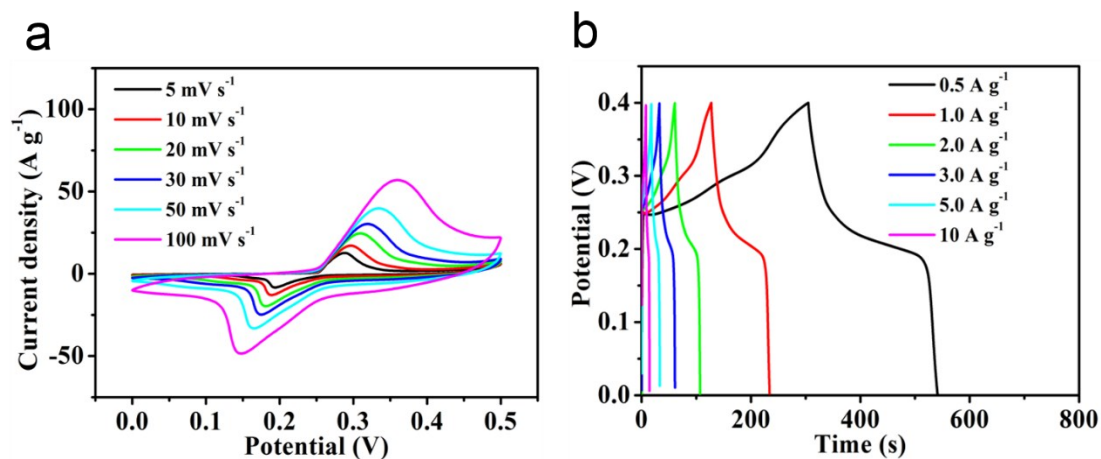

**Fig. S5** Electrochemical performance of the Ni-CAT: (a) CV curves at different scan rates. (b) GCD curves at different current densities.

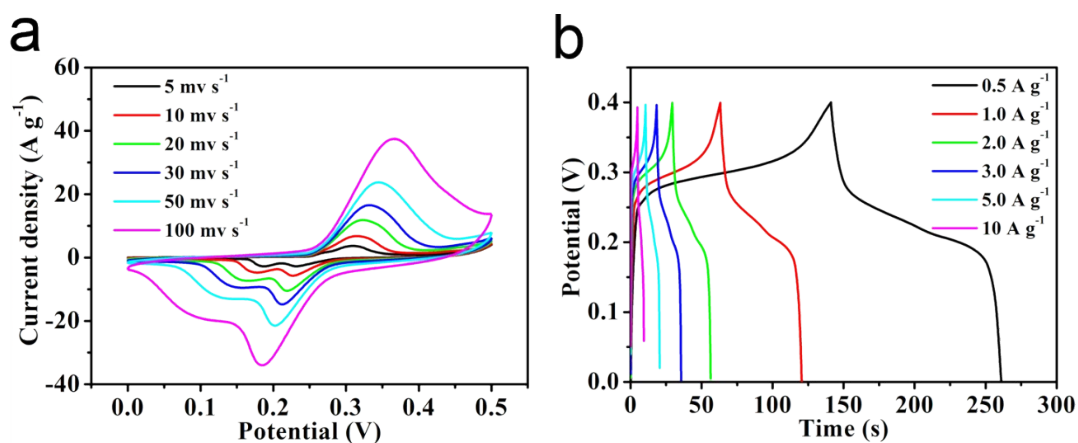

**Fig. S6** Electrochemical performance of the CNFs: (a) CV curves at different scan rates. (b) GCD curves at different current densities.

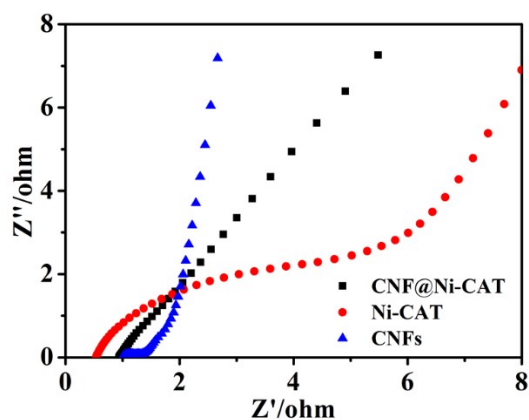

**Fig. S7** Nyquist plots of CNFs, Ni-CAT and CNF@Ni-CAT.

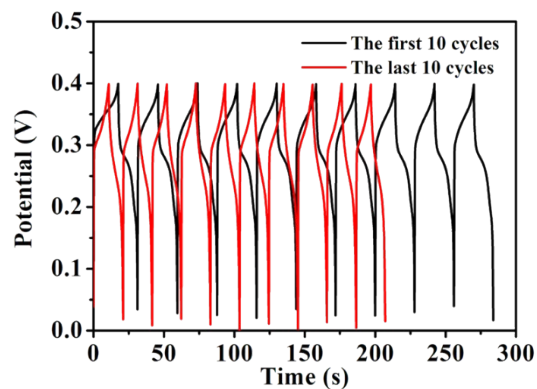

**Fig. S8** The first and the last 10 GCD cycles recorded of CNF@Ni-CAT.

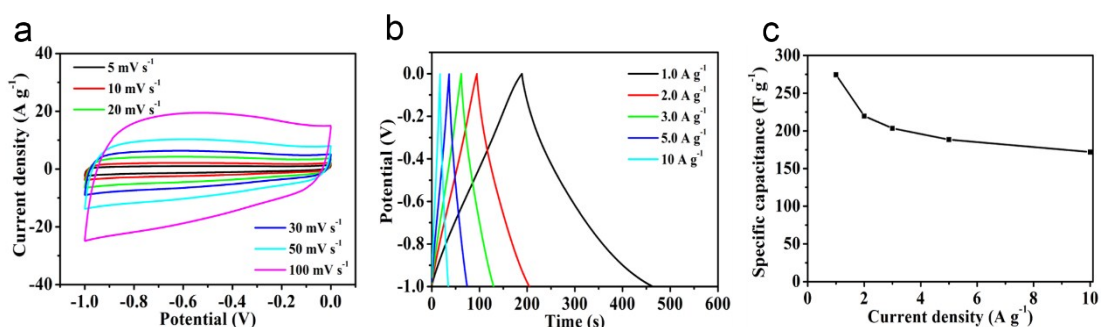

**Fig. S9** Electrochemical performance of the AC: (a) CV curves at different scan rates. (b) GCD curves at different current densities. (c) Specific capacitance at different current densities.

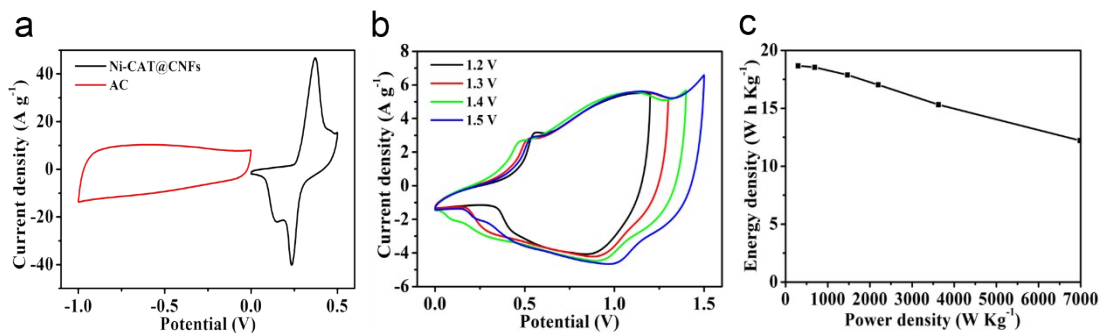

**Fig. S10** (a) CV curves of CNF@Ni-CAT and AS electrode obtained in three-electrode system at a scan rate of  $50 \text{ mV s}^{-1}$ . (b) CV curves with different voltage windows at a scan rate of  $50 \text{ mV s}^{-1}$ . (c) Ragone plots of the ASC.

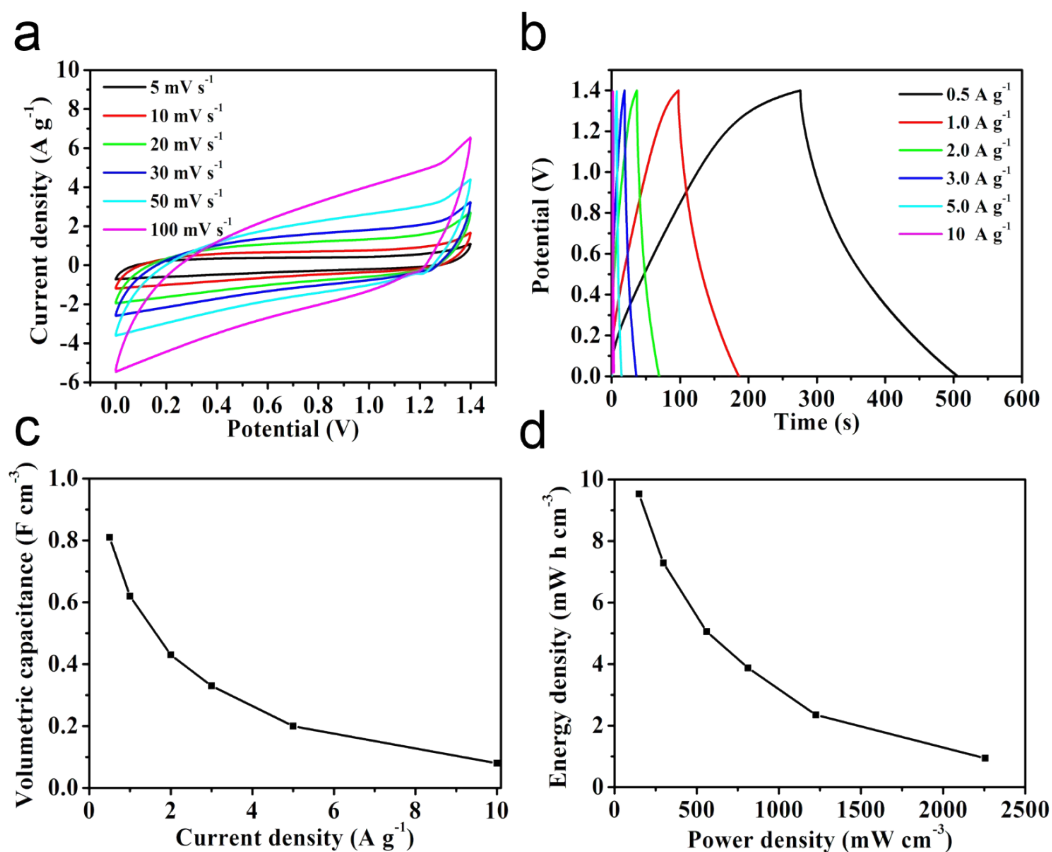

**Fig. S11** Electrochemical performance of all-solid-state ASC device of CNF@Ni-CAT//AC: (a) CV curves at different scan rates. (b) GCD curves at different current densities. (c) Volumetric capacitance at different current densities. (d) Ragone plots of the ASC device.

**Table S1** Electrochemical performance comparison of CNF@Ni-CAT with related materials previously reported in supercapacitors.

| Materials                           | Electrochemical performance (F g <sup>-1</sup> ) | Current density (A g <sup>-1</sup> ) | Cycle retention rate/Cycle numbers | Ref.      |
|-------------------------------------|--------------------------------------------------|--------------------------------------|------------------------------------|-----------|
| CNF@Ni-CAT                          | 413.5                                            | 0.5                                  | 73%/5000                           | This work |
| Ni <sub>3</sub> (HITP) <sub>2</sub> | 107                                              | 0.05                                 | 90%/10000                          | 34        |
| Cu-CAT NWAs                         | 202                                              | 0.5                                  | 80%/5000                           | 35        |
| Ni-CAT/NiCo-LDH/NF                  | 1877                                             | 1                                    | 80%/1000                           | S1        |
| CNFs/MnOx/RGO                       | 174                                              | 0.2                                  | 91%/500                            | S2        |
| CNFs/MnO <sub>2</sub>               | 292                                              | 2.5                                  | 76%/3500                           | S3        |
| CNFs/NiO                            | 288                                              | 0.3                                  | 89%/3000                           | S4        |

## References

- S1. L. Y. Li, J. J. Zhou, M. K. Wu, C. Chen, K. Tao, F. Y. Yi and L. Han, *Inorg. Chem*, 2018, **57**, 6202–6205.
- S2. S. Kwon, T. Kim, J. S. Lee, S. J. Park, H. W. Park, M. Kang, J. E. Lee, J. Jang, and H. Yoon, *Small*, 2013, **9**, 248.
- S3. L. Zhao, J. Yu, W. J. Li, S. G. Wang, C. L. Dai, J. W. Wu, X. D. Bai and C. Y. Zhi, *Nano Energy*, 2014, **4**, 39.
- S4. D. H. Shin, J. S. Lee, J. Jun and J. Jang, *J. Mater. Chem. A*, 2014, **2**, 3364.
